# Supplementary material
Source: MDPI journal article supplement (https://www.mdpi.com/2571-905X/3/3/22)

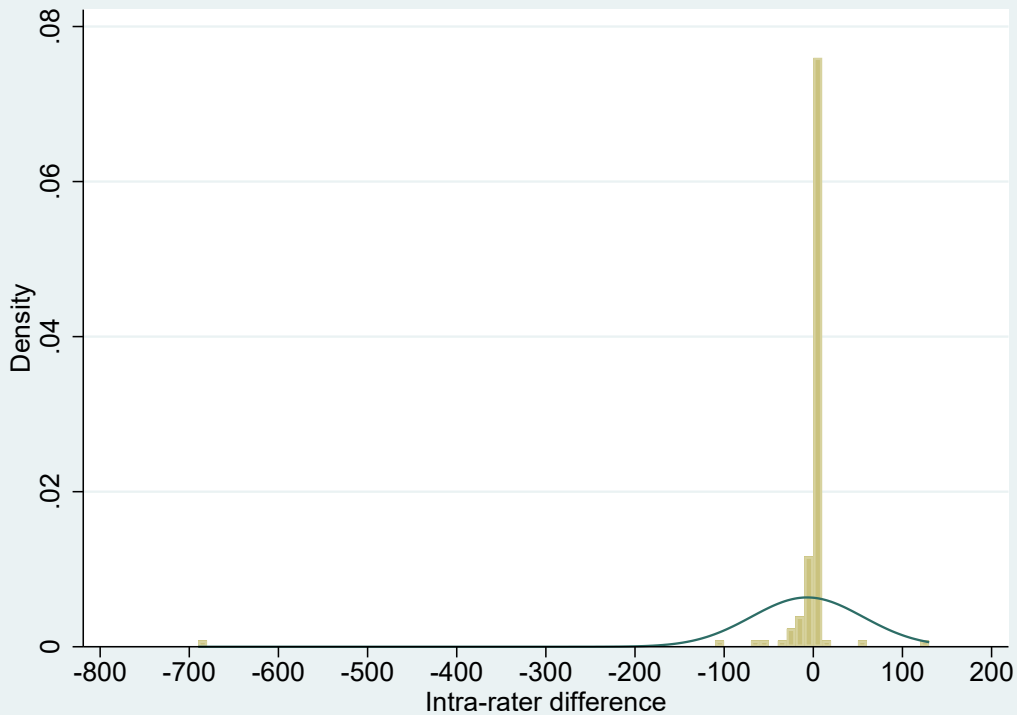

Supplement: s1 [file s1]
